# Supplementary material
Source: publisher figshare collection journal article supplement (https://wiley.figshare.com/ndownloader/files/14982389)
Supplement: Supplementary file 1 [file 14982389]

# Generated by roxygen2: do not edit by hand

export(GenBsSamps)
export(GenData)
export(GenNoiseSamps)
export(MeanPart)
export(SetOTA)
export(WassDist)
export(align.control)
export(align2)
export(plot_part)
export(plot_part2)
